# Supplementary material for: Photo-enhanced piezocatalytic hydrogen evolution using in situ silver piezodeposited scheelite-type BaMoO4 and BaWO4
Source: Royal Society of Chemistry journal article supplement (doi:10.1039/d3ta04626e), 2023-12-01
Supplement: d3ta04626e1.pdf [file d3ta04626e1.pdf]

## Supporting Information

### Photo-Enhanced Piezocatalytic Hydrogen Evolution by In Situ Silver Piezodeposited Scheelite-type BaMoO<sub>4</sub> and BaWO<sub>4</sub>

Talha Kuru<sup>a</sup>, Adem Sarilmaz<sup>b</sup>, Emre Aslan<sup>c</sup>, Faruk Ozel<sup>b</sup>, Imren Hatay Patir<sup>\*a</sup>

#### Band-gap Calculation

The band-gap values and types of piezo-catalysts were determined by following the steps below.<sup>1-4</sup>

1. Diffuse reflection measurements were performed to investigate optical properties and band-gap calculations.
2. Absorption ( $F(R_{\infty})$ ) was calculated using the Kubelka-Munk equation ( $F(R_{\infty})=(1-R_{\infty})^2/2R_{\infty}$ ).
3. Approximately band-gaps were estimated by plotting  $d[\ln(F(R_{\infty})\text{h}\nu)]/[\text{h}\nu]$  vs. photon energy graphs (BaMoO<sub>4</sub>: 3.01 eV and BaWO<sub>4</sub>: 2.96 eV).
4. Approximately band gaps were used to determine the m exponent in the Tauc equation ( $F(R_{\infty})\text{h}\nu = A(\text{h}\nu - E_g)^m$ ).  $\ln(F(R_{\infty})\text{h}\nu)$  vs.  $\ln(\text{h}\nu - E_g)$  graphs were plotted, and m exponents were determined from the slope of the plot (BaMoO<sub>4</sub>: 0.399 and BaWO<sub>4</sub>: 0.409). These values are close to 0.5 indicating that piezo-catalysts have the direct band transition type.
5. The band-gaps were calculated by plotting  $(F(R_{\infty})\text{h}\nu)^2$  vs. photon energy graphs (BaMoO<sub>4</sub>: 3.32 eV and BaWO<sub>4</sub>: 2.93 eV).

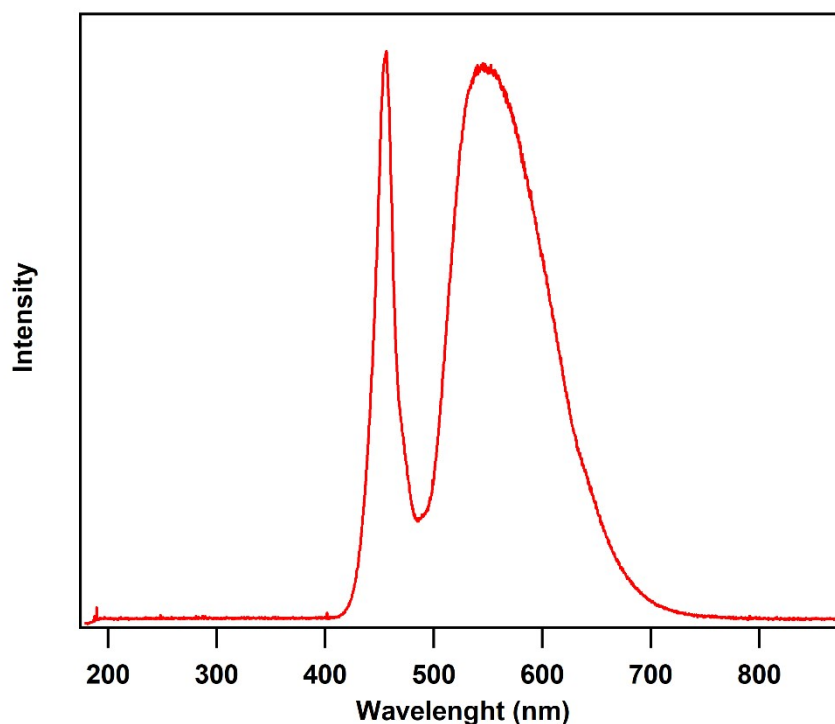

Figure S1. White LED light spectrum

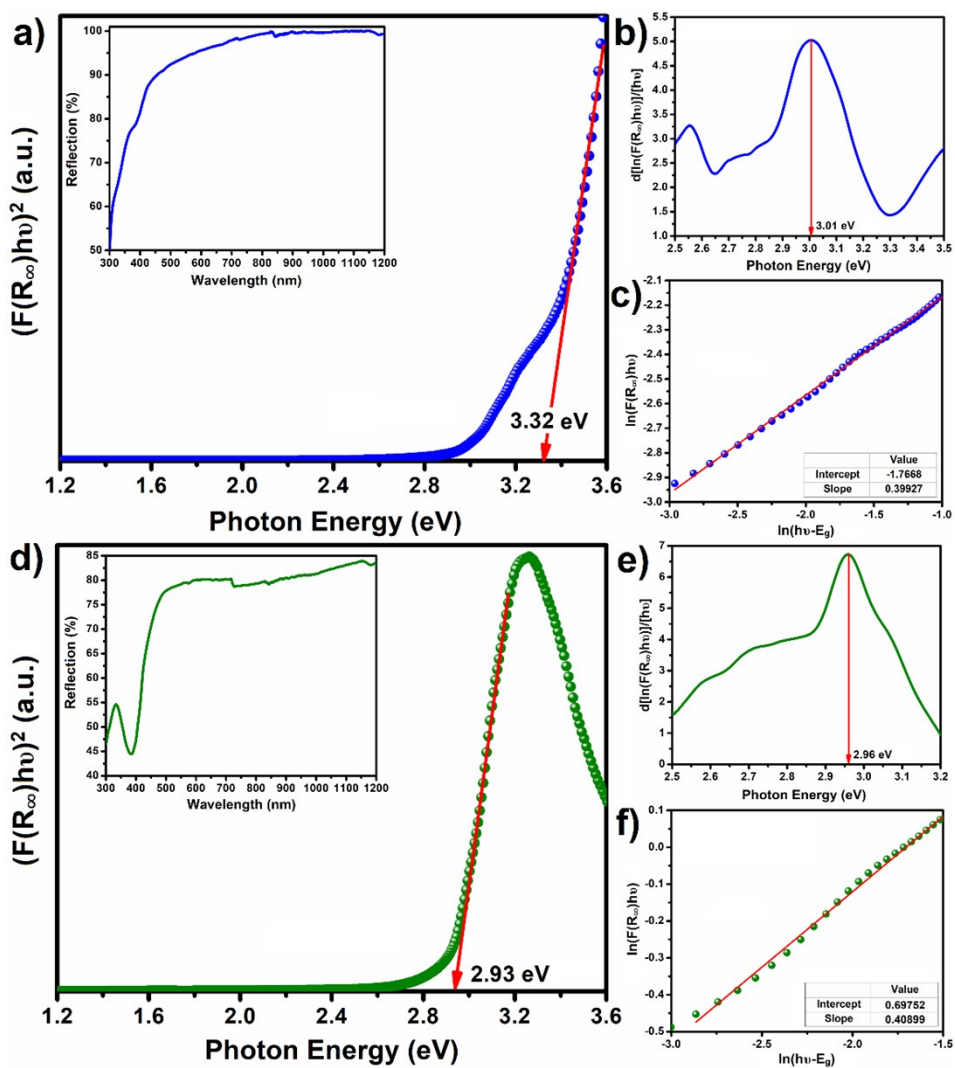

**Figure S2.** Band-gap energy graphs (a,d),  $d[\ln(F(R_{\infty})h\nu)]/[h\nu]$  vs. photon energy graphs (b,e),  $\ln(F(R_{\infty})h\nu)$  vs.  $\ln(h\nu-E_g)$  graphs (c,f) of  $\text{BaMoO}_4$  (a-c) and  $\text{BaWO}_4$  (d-f). Diffuse reflection graphs were given as an inset figure in the band-gap energy diagrams.

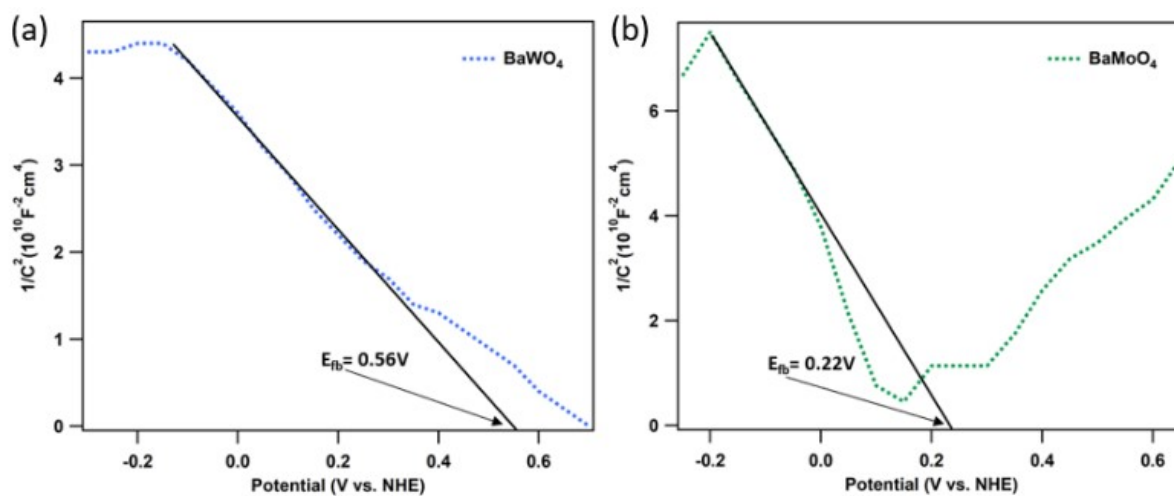

**Figure S3.** Mott-Schottky plots of (a)  $\text{BaWO}_4$  and (b)  $\text{BaMoO}_4$  in 0.1M  $\text{NaSO}_4$ . V vs. NHE at pH=7

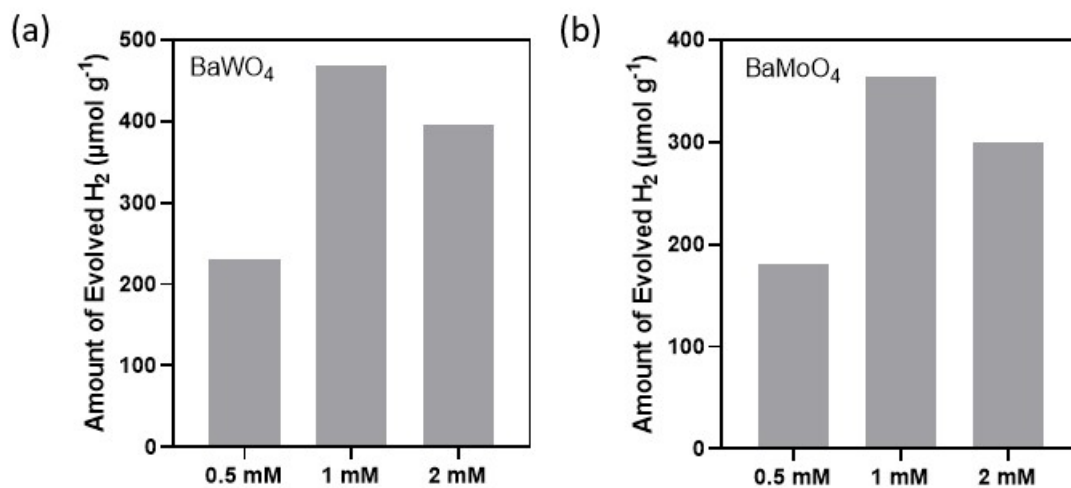

**Figure S4.** Piezocatalytic hydrogen production results of (a) BaWO<sub>4</sub> and (b) BaMoO<sub>4</sub> depending on Ag piezodeposition at 0.5, 1 and 2 mM AgNO<sub>3</sub> concentrations

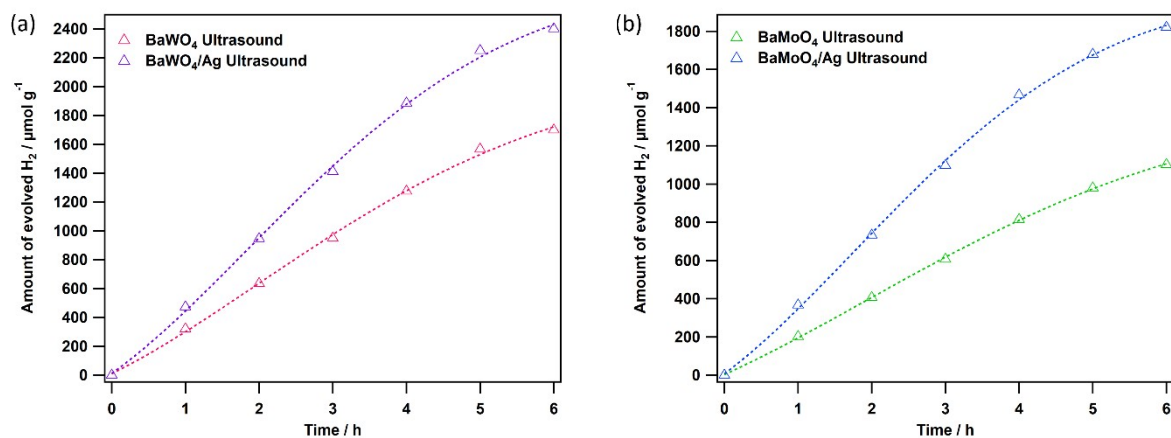

**Figure S5.** The piezocatalytic hydrogen production of (a) BaWO<sub>4</sub>, BaWO<sub>4</sub>/Ag, (b) BaMoO<sub>4</sub> and BaMoO<sub>4</sub>/Ag for 6 hour.

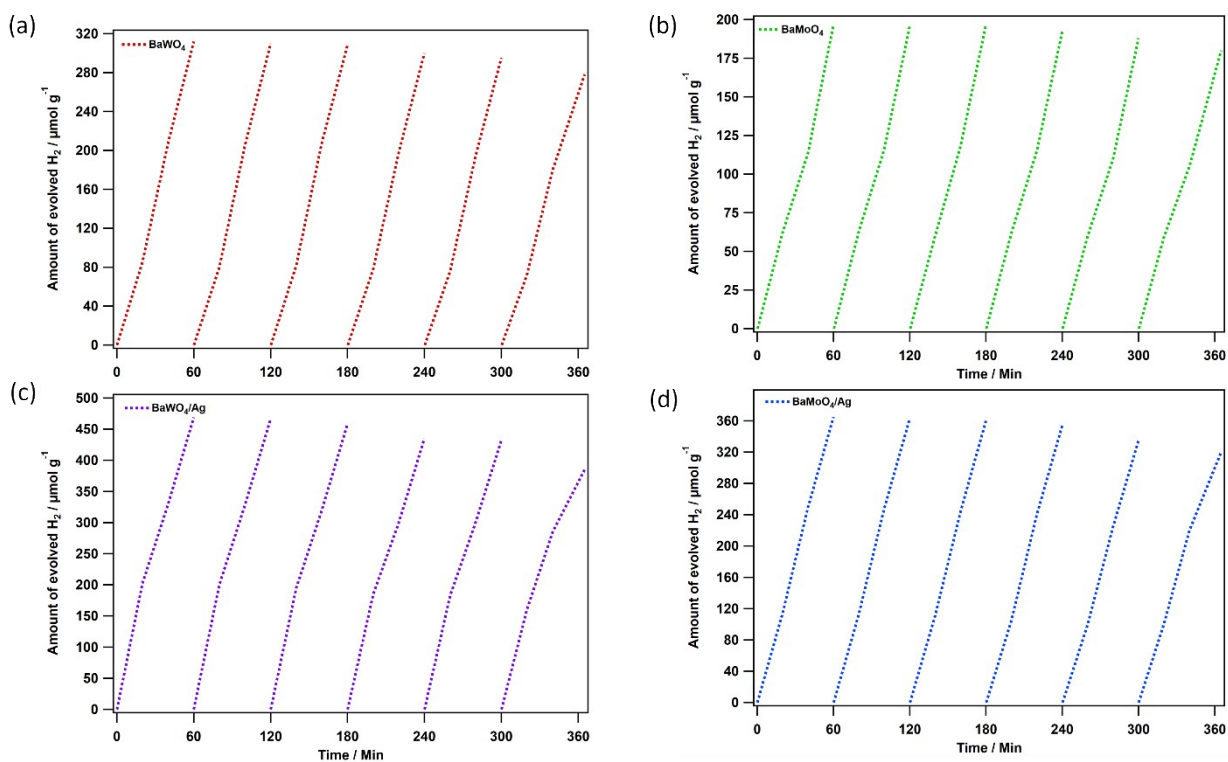

**Figure S6.** Reusability experiments for piezocatalytic hydrogen production of (a)  $\text{BaWO}_4$ , (b)  $\text{BaMoO}_4$ , (c)  $\text{BaWO}_4/\text{Ag}$  and (d)  $\text{BaMoO}_4/\text{Ag}$  for 6 cycles

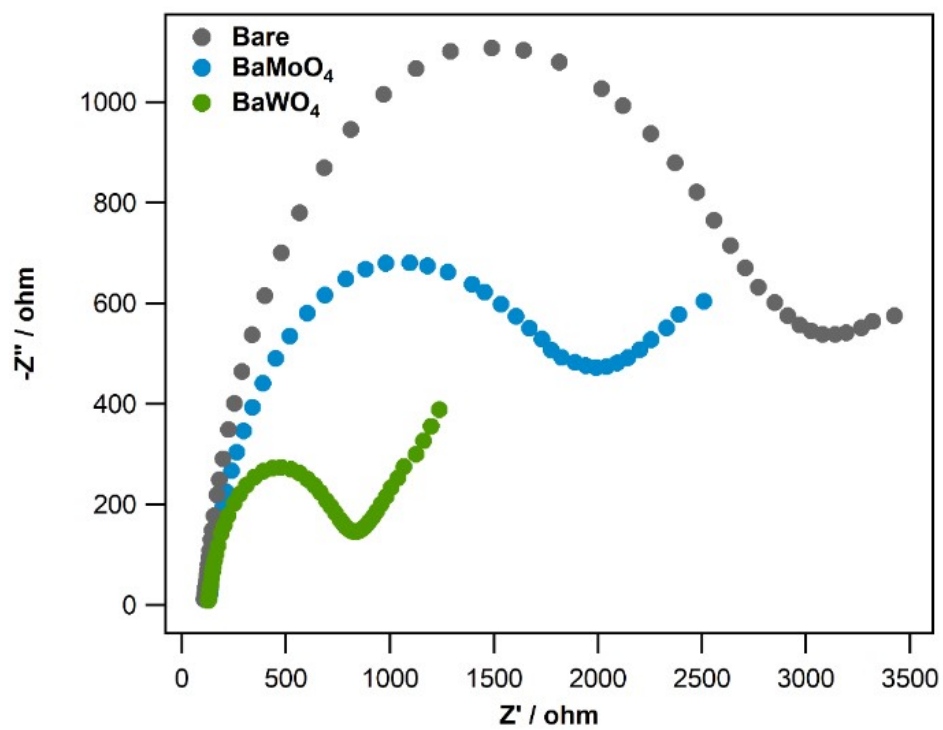

**Figure S7.** Nyquist plots of  $\text{BaMoO}_4$  and  $\text{BaWO}_4$  from Electrochemical Impedance Spectroscopy (EIS).

**Table S1.** Comparison of H<sub>2</sub> production rates of different piezocatalysts

| Catalyst                                   | Catalytic Condition                                                         | Scavenger                                         | H <sub>2</sub> production                   | Ref              |
|--------------------------------------------|-----------------------------------------------------------------------------|---------------------------------------------------|---------------------------------------------|------------------|
| ZnS nanosheet                              | Ultrasonic: 100 W 27 kHz                                                    | Pure Water                                        | 1080 $\mu\text{mol h}^{-1} \text{g}^{-1}$   | 5                |
| BaTiO <sub>3</sub> nanoparticle            | Ultrasonic: 100 W 40 kHz                                                    | 15% TEOA                                          | 2 $\mu\text{mol h}^{-1} \text{g}^{-1}$      | 6                |
| BaTiO <sub>3</sub> nanowire                | Ultrasonic: 100 W 40 kHz                                                    | 15% TEOA                                          | 18 $\mu\text{mol h}^{-1} \text{g}^{-1}$     | 6                |
| BaTiO <sub>3</sub> nanosheet               | Ultrasonic: 100 W 40 kHz                                                    | 15% TEOA                                          | 92 $\mu\text{mol h}^{-1} \text{g}^{-1}$     | 6                |
| Bi <sub>2</sub> WO <sub>6</sub> nanoplate  | Ultrasonic: 40 kHz                                                          | 20% TEOA                                          | 191 $\mu\text{mol h}^{-1} \text{mg}^{-1}$   | 7                |
| CdS nanosheet                              | Ultrasonic: 50 kHz                                                          | Na <sub>2</sub> S/Na <sub>2</sub> SO <sub>3</sub> | 144 $\mu\text{mol h}^{-1} \text{mg}^{-1}$   | 8                |
| CdS nanosheet                              | Ultrasonic: 50 kHz<br>Light: 300 W Xe lamp                                  | Na <sub>2</sub> S/Na <sub>2</sub> SO <sub>3</sub> | 633 $\mu\text{mol h}^{-1} \text{mg}^{-1}$   | 8                |
| bulk g-C <sub>3</sub> N <sub>4</sub>       | Ultrasonic: 250 W 40 kHz                                                    | 0.1 M Glucose                                     | 2690 $\mu\text{mol g}^{-1} \text{h}^{-1}$   | 9                |
| Ultra thin g-C <sub>3</sub> N <sub>4</sub> | Ultrasonic: 250 W 40 kHz                                                    | 0.1 M Glucose                                     | 8350 $\mu\text{mol g}^{-1} \text{h}^{-1}$   | 9                |
| Ultra thin g-C <sub>3</sub> N <sub>4</sub> | Ultrasonic: 50 kHz<br>Light: $\lambda \geq 420 \text{ nm}$                  | 0.1 M Glucose                                     | 12160 $\mu\text{mol g}^{-1} \text{h}^{-1}$  | 9                |
| BaWO <sub>4</sub>                          | Ultrasonic: 50 kHz                                                          | 5% TEOA,<br>pH = 9                                | 312.58 $\mu\text{mol g}^{-1} \text{h}^{-1}$ | <b>This Work</b> |
| BaMoO <sub>4</sub>                         | Ultrasonic: 50 kHz                                                          | 5% TEOA,<br>pH = 9                                | 197.97 $\mu\text{mol g}^{-1} \text{h}^{-1}$ | <b>This Work</b> |
| BaWO <sub>4</sub>                          | Ultrasonic: 50 kHz<br>Light: White LED Light, $\lambda \geq 420 \text{ nm}$ | 5% TEOA,<br>pH = 9                                | 1103 $\mu\text{mol g}^{-1} \text{h}^{-1}$   | <b>This Work</b> |
| BaMoO <sub>4</sub>                         | Ultrasonic: 50 kHz<br>Light: White LED Light, $\lambda \geq 420 \text{ nm}$ | 5% TEOA,<br>pH = 9                                | 788.76 $\mu\text{mol g}^{-1} \text{h}^{-1}$ | <b>This Work</b> |

## References

1. A. Sarilmaz, G. Yanalak, E. Aslan, F. Ozel, I. H. Patir and M. Ersoz, *Renewable Energy*, 2021, **164**, 254-259.
2. G. Yanalak, A. Sarilmaz, G. Karanfil, E. Aslan, F. Ozel and I. H. Patir, *Journal of Photochemistry and Photobiology A: Chemistry*, 2020, **394**, 112462.
3. T. L. Le, S. Guillemet-Fritsch, P. Dufour and C. Tenailleau, *Thin Solid Films*, 2016, **612**, 14-21.
4. M. Borah and D. Mohanta, *Journal of Applied Physics*, 2012, **112**.
5. W. Feng, J. Yuan, L. Zhang, W. Hu, Z. Wu, X. Wang, X. Huang, P. Liu and S. Zhang, *Applied Catalysis B: Environmental*, 2020, **277**, 119250.
6. C. Yu, M. Tan, Y. Li, C. Liu, R. Yin, H. Meng, Y. Su, L. Qiao and Y. Bai, *Journal of Colloid and Interface Science*, 2021, **596**, 288-296.
7. X. Xu, L. Xiao, Z. Wu, Y. Jia, X. Ye, F. Wang, B. Yuan, Y. Yu, H. Huang and G. Zou, *Nano Energy*, 2020, **78**, 105351.
8. Y. Zhao, X. Huang, F. Gao, L. Zhang, Q. Tian, Z.-B. Fang and P. Liu, *Nanoscale*, 2019, **11**, 9085-9090.
9. C. Hu, F. Chen, Y. Wang, N. Tian, T. Ma, Y. Zhang and H. Huang, *Advanced Materials*, 2021, **33**, 2101751.
